# Supplementary material
Source: PubMed Central journal article supplement (PMC5761733)
Supplement: NIHMS903623-supplement-ESI.pdf [file NIHMS903623-supplement-ESI.pdf]

# Peracetic acid disinfection kinetics for combined sewer overflows: indicator organisms, antibiotic resistance genes, and microbial community

*AUTHOR NAMES* Alessia Eramo, William Morales Medina, and N.L. Fahrenfeld\*

*AUTHOR ADDRESS* Department of Civil and Environmental Engineering, Rutgers, The State University of New Jersey, 96 Frelinghuysen Rd., Piscataway, New Jersey 08854, United States

Correspondence: [nfahrenf@rutgers.edu](mailto:nfahrenf@rutgers.edu), (848) 445-8416

## APPENDIX

**Table S1.** Primers, annealing temperatures, and amplicon lengths.

| Gene          | Primer sequence                                                                                                                       | Ta (°C) | Amplicon length (bp) | Source |
|---------------|---------------------------------------------------------------------------------------------------------------------------------------|---------|----------------------|--------|
| <i>sul1</i>   | CGCACCGGAAACATCGCTGCAC<br>TGAAGTTCCGCCGCAAGGCTCG                                                                                      | 65      | 163                  | 1      |
| <i>tet(G)</i> | GCAGAGCAGGTCGCTGG<br>CCYGCAAGAGAAGCCAGAAG                                                                                             | 68      | 134                  | 2      |
| <i>mexB</i>   | GTGTTCGGCTCGCAGTACTC<br>AACCGTCGGGATTGACCTTG                                                                                          | 60      | 244                  | 3      |
| BacHum        | TGA GTT CAC ATG TCC GCA<br>TGA<br><br>CGT TAC CCC GCC TAC TAT<br>CTA ATG<br><br>/56-FAM/TCC GGT AGA CGA<br>TGG GGA TGC GTT /36-TAMSp/ | 60      | 81                   | 4      |
| 16S rRNA      | CCTACGGGAGGCAGCAG<br>ATTACCGCGGCTGCTGG                                                                                                | 65      | 202                  | 5      |

**Table S2.** Average water quality data ( $\pm$ standard deviation, n=3) for source wastewater from disinfection experiments (Experiments 1 and 2) and PAA degradation experiment (Experiment 3).

|               | Experiment 1  | Experiment 2   | Experiment 3 |             |              |              |
|---------------|---------------|----------------|--------------|-------------|--------------|--------------|
|               | WWTPa         | WWTPb          | WWTPa        | WWTPb       |              |              |
| Sampling date | 10/26/2015    | 11/16/2016     | 7/14/2017    |             |              |              |
| Percent WW    | 23%           | 40%            | 23%          | 11.50%      | 40%          | 20%          |
| TSS (mg/L)*   | 228 $\pm$ 109 | 63 $\pm$ 31    | -            |             | 280          |              |
| COD (mg/L)    | -             | 79 $\pm$ 8     | 75 $\pm$ 18  | 39 $\pm$ 13 | 158 $\pm$ 34 | 117 $\pm$ 69 |
| pH            | -             | 7.7 $\pm$ 0.01 | 6.88         |             | 6.59         |              |

\*TSS was measured in 100% WW samples

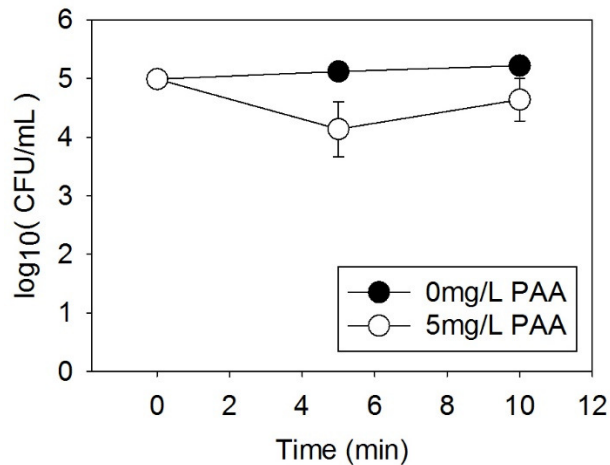

**Fig. S1** Colony forming units (CFU) on LB agar from 40% WW treated with 0 mg/L or 5 mg/L PAA (n=2 or 3).

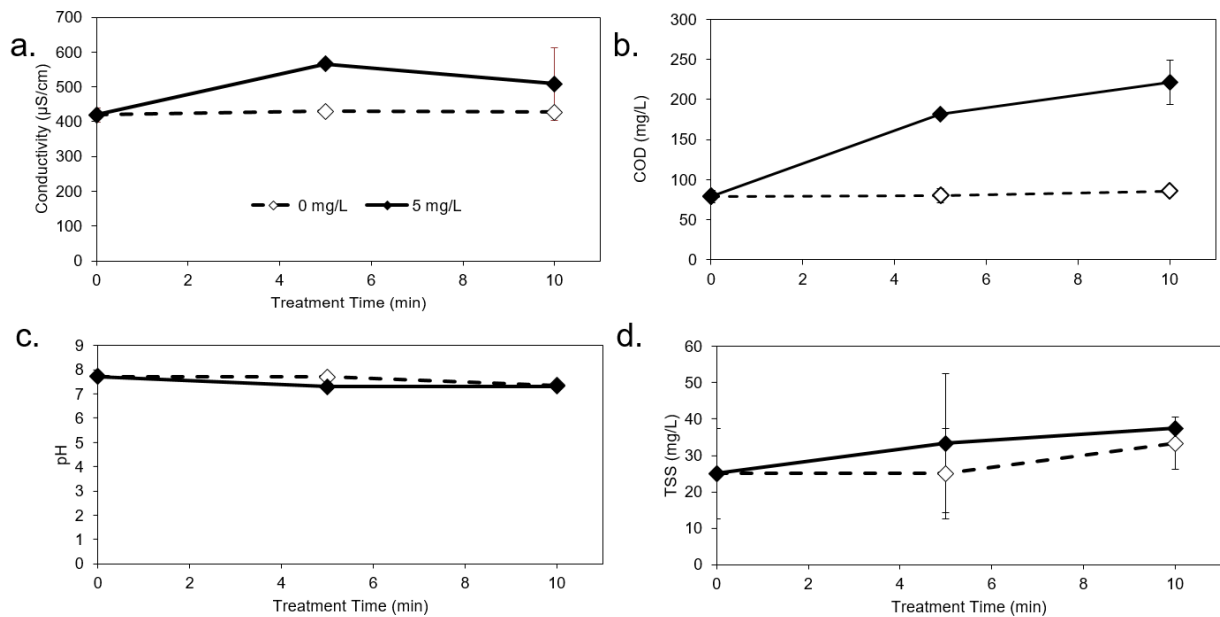

**Fig. S2** Water quality parameters (a) conductivity, (b) chemical oxygen demand (COD), (c) pH and (d) total suspended solids (TSS) in 40% WW treated with 5 mg/L PAA compared to no PAA controls.

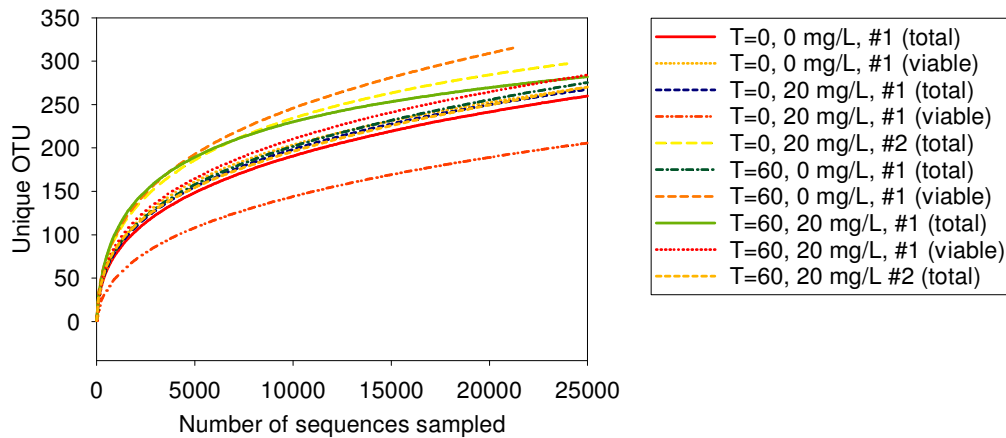

**Fig. S3** Rarefaction curves for samples treated with 20mg/L PAA or no treatment controls for 0 or 60 min. Viable indicates samples treated with propidium monoazide prior to submission for sequencing. # indicates replicate number.

## References

1. Pei, R.; Kim, S.-C.; Carlson, K. H.; Pruden, A., Effect of river landscape on the sediment concentrations of antibiotics and corresponding antibiotic resistance genes (ARG). *Water Res.* **2006**, *40*, (12), 2427-2435.
2. Aminov, R.; Garrigues-Jeanjean, N.; Mackie, R., Molecular ecology of tetracycline resistance: development and validation of primers for detection of tetracycline resistance genes encoding ribosomal protection proteins. *Appl. Environ. Microbiol.* **2001**, *67*, (1), 22-32.
3. Yoneda, K.; Chikumi, H.; Murata, T.; Gotoh, N.; Yamamoto, H.; Fujiwara, H.; Nishino, T.; Shimizu, E., Measurement of *Pseudomonas aeruginosa* multidrug efflux pumps by quantitative real-time polymerase chain reaction. *FEMS Microbiol Lett* **2005**, *243*, (1), 125-31.
4. Kildare, B. J.; Leutenegger, C. M.; McSwain, B. S.; Bambic, D. G.; Rajal, V. B.; Wuertz, S., 16S rRNA-based assays for quantitative detection of universal, human-, cow-, and dog-specific fecal *Bacteroidales*: A Bayesian approach. *Water Res.* **2007**, *41*, (16), 3701-3715.
5. Muyzer, G.; De Waal, E. C.; Uitterlinden, A. G., Profiling of complex microbial populations by denaturing gradient gel electrophoresis analysis of polymerase chain reaction-amplified genes coding for 16S rRNA. *Appl. Environ. Microbiol.* **1993**, *59*, (3), 695-700.
